# Supplementary material
Source: PubMed Central journal article supplement (PMC7049089)
Supplement: NIHMS1562833-supplement-1.pdf [file NIHMS1562833-supplement-1.pdf]

Supplementary Figure 1. Bagplot of log-transformed maximum ferritin and CRP for the study cohort, with circles points representing patients who died.

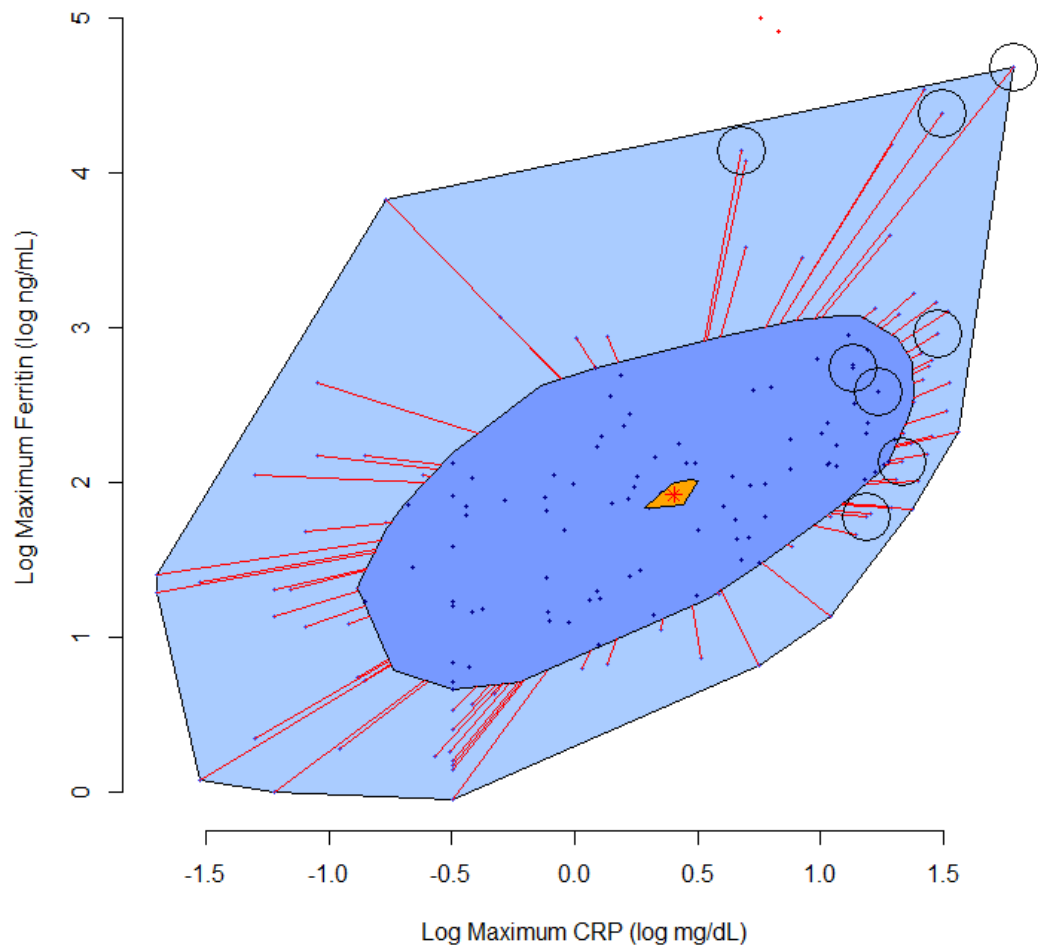

Supplementary Figure 2. Risk contingency table for mortality based on cut-points for C-reactive protein and ferritin and patients' *last* value for each biomarker.

|                      | Ferritin $\leq 373$ ng/mL                                                                                                                                                 | Ferritin $> 373$ ng/mL                                                                                                                                                      |
|----------------------|---------------------------------------------------------------------------------------------------------------------------------------------------------------------------|-----------------------------------------------------------------------------------------------------------------------------------------------------------------------------|
| CRP $> 7.1$ mg/dL    | <p><b><u>Intermediate Risk</u></b><br/> <b>Hospital Mortality:</b> 1 / 16 (6.3)<br/> <b>90-day Mortality:</b> 1 / 16 (6.3)<br/> <b>1-year Mortality:</b> 1 / 16 (6.3)</p> | <p><b><u>High Risk</u></b><br/> <b>Hospital Mortality:</b> 2 / 10 (20.0)<br/> <b>90-day Mortality:</b> 3 / 10 (30.0)<br/> <b>1-year Mortality:</b> 3 / 10 (30.0)</p>        |
| CRP $\leq 7.1$ mg/dL | <p><b><u>Low Risk</u></b><br/> <b>Hospital Mortality:</b> 3 / 125 (2.4)<br/> <b>90-day Mortality:</b> 3 / 125 (2.4)<br/> <b>1-year Mortality:</b> 4 / 125 (3.2)</p>       | <p><b><u>Intermediate Risk</u></b><br/> <b>Hospital Mortality:</b> 2 / 21 (9.5)<br/> <b>90-day Mortality:</b> 3 / 21 (14.3)<br/> <b>1-year Mortality:</b> 3 / 21 (14.3)</p> |

Data is displayed as n / N (%) for mortality outcomes
